# Supplementary material for: Cigarette smoking patterns preceding primary Sjögren’s syndrome
Source: PubMed Central journal article supplement — RMD Open. 2020 Sep 29;6(3):e001402. doi: 10.1136/rmdopen-2020-001402 (PMC7547543; doi:10.1136/rmdopen-2020-001402), 2020-09-29
Supplement: rmdopen-2020-001402s001.pdf [file rmdopen-2020-001402s001.pdf]

**Supplementary table 1.** Questions on past and current smoking habits in GESS, EIRA 1 and EIRA 2 (translated from Swedish).

| Questionnaire | Formulation of questions                                                                                                                                                                                                                                             | Start of smoking period                                  | End of smoking period                             | Smoking dose                 | Other                                                                                                                                   |
|---------------|----------------------------------------------------------------------------------------------------------------------------------------------------------------------------------------------------------------------------------------------------------------------|----------------------------------------------------------|---------------------------------------------------|------------------------------|-----------------------------------------------------------------------------------------------------------------------------------------|
| <b>GESS</b>   | <p>Do you smoke regularly or have you previously smoked regularly during any period in your life?<br/>(answers: yes/no)</p> <p>If "yes", please provide time periods and amount below. If you still smoke regularly, state the current year in the box "to year"</p> | From year                                                | To year                                           | Number of cigarettes per day | Respondents were able to provide four periods of regular smoking. The equivalent questions were also provided for intermittent smoking. |
| <b>EIRA 1</b> | <p>Do you smoke?<br/>(answers: No/Yes, regularly/yes, intermittently, e.g. at parties)</p> <p>If you do not smoke, have you previously smoked?<br/>(answers: No/Yes, regularly/yes, intermittently, e.g. at parties)</p>                                             | If you smoke/previously smoked, what year did you start? | If you previously smoked, what year did you stop? | How many cigarettes/day?     | Respondents were able to provide one period of smoking.                                                                                 |
| <b>EIRA 2</b> | If you smoke regularly or have previously smoked regularly, tick the box and provide time-period and amount below.                                                                                                                                                   | From year                                                | To year                                           | Number of cigarettes per day | Respondents were able to provide four periods of regular smoking. The equivalent questions were also provided for intermittent smoking. |

**Supplementary table 2.** Age-wise period prevalence of regular smoking prior to pSS diagnosis.

| pSS patients                       | Age                   | Risk estimate |             | <u>N exposed (%)</u> |                    |
|------------------------------------|-----------------------|---------------|-------------|----------------------|--------------------|
|                                    |                       | Odds Ratio    | 95% CI      | Cases                | Controls           |
| <b>All pSS patients</b>            | <b>10 to 19 years</b> | 0.85          | (0.67-1.07) | <u>135 (26%)</u>     | <u>1,059 (24%)</u> |
|                                    | <b>20 to 29 years</b> | <b>0.81</b>   | (0.65-1.00) | <u>170 (34%)</u>     | <u>1,437 (35%)</u> |
|                                    | <b>30 to 39 years</b> | 0.80          | (0.63-1.02) | <u>128 (30%)</u>     | <u>1,136 (32%)</u> |
|                                    | <b>40 to 49 years</b> | 0.74          | (0.55-1.00) | <u>74 (22%)</u>      | <u>792 (29%)</u>   |
| <b>SSA and/or SSB positive pSS</b> | <b>10 to 19 years</b> | 0.82          | (0.63-1.08) | <u>95 (26%)</u>      | <u>763 (25%)</u>   |
|                                    | <b>20 to 29 years</b> | 0.81          | (0.63-1.04) | <u>122 (35%)</u>     | <u>1,014 (36%)</u> |
|                                    | <b>30 to 39 years</b> | 0.86          | (0.64-1.15) | <u>92 (32%)</u>      | <u>777 (33%)</u>   |
|                                    | <b>40 to 49 years</b> | 0.84          | (0.58-1.21) | <u>51 (23%)</u>      | <u>523 (29%)</u>   |
| <b>SSA/SSB negative pSS</b>        | <b>10 to 19 years</b> | 0.92          | (0.60-1.41) | <u>39 (26%)</u>      | <u>286 (22%)</u>   |
|                                    | <b>20 to 29 years</b> | 0.81          | (0.54-1.21) | <u>47 (32%)</u>      | <u>410 (33%)</u>   |
|                                    | <b>30 to 39 years</b> | 0.70          | (0.44-1.09) | <u>36 (27%)</u>      | <u>350 (31%)</u>   |
|                                    | <b>40 to 49 years</b> | 0.61          | (0.35-1.03) | <u>23 (21%)</u>      | <u>264 (29%)</u>   |

Abbreviations: pSS, primary Sjögren's syndrome; SSA, Ro/SSA autoantibodies; La/SSB autoantibodies; CI, confidence interval.

**Supplementary table 3.** HLA frequency analysis in pSS patients and controls.

| pSS patients                      | Presence of $\geq 1$ HLA allele | Crude risk estimate <sup>4</sup> |              | Adjusted risk estimate <sup>5</sup> |             | Allele frequency |          |
|-----------------------------------|---------------------------------|----------------------------------|--------------|-------------------------------------|-------------|------------------|----------|
|                                   |                                 | Odds Ratio                       | 95% CI       | Odds Ratio                          | 95% CI      | Cases            | Controls |
| All pSS patients <sup>1</sup>     | HLA-DRB1*01                     | <b>0.55</b>                      | (0.39-0.78)  |                                     |             | 13%              | 21%      |
|                                   | HLA-DRB1*03                     | <b>3.38</b>                      | (2.63-4.34)  | <b>3.31</b>                         | (2.52-4.34) | 55%              | 25%      |
|                                   | HLA-DRB1*04                     | <b>0.51</b>                      | (0.38-0.68)  |                                     |             | 23%              | 36%      |
|                                   | HLA-DRB1*10                     | 0.82                             | (0.27-2.46)  |                                     |             | 1%               | 2%       |
|                                   | HLA-DRB1*15                     | <b>1.66</b>                      | (1.29-2.13)  | <b>1.74</b>                         | (1.31-2.32) | 39%              | 28%      |
|                                   | HLA-DRB1*01/04/10               | <b>0.41</b>                      | (0.32-0.53)  | <b>0.63</b>                         | (0.48-0.84) | 33%              | 54%      |
| SSA/SSB positive pSS <sup>2</sup> | HLA-DRB1*01                     | <b>0.37</b>                      | (0.23-0.58)  |                                     |             | 9%               | 22%      |
|                                   | HLA-DRB1*03                     | <b>5.04</b>                      | (3.69-6.91)  | <b>5.06</b>                         | (3.58-7.16) | 67%              | 27%      |
|                                   | HLA-DRB1*04                     | <b>0.29</b>                      | (0.20-0.44)  |                                     |             | 15%              | 36%      |
|                                   | HLA-DRB1*10                     | 0.55                             | (0.12-2.44)  |                                     |             | 1%               | 2%       |
|                                   | HLA-DRB1*15                     | <b>2.00</b>                      | (1.49-2.68)  | <b>2.08</b>                         | (1.46-2.96) | 43%              | 28%      |
|                                   | HLA-DRB1*01/04/10               | <b>0.25</b>                      | (0.18-0.36)  | <b>0.41</b>                         | (0.28-0.60) | 24%              | 54%      |
| SSA/SSB negative pSS <sup>3</sup> | HLA-DRB1*01                     | 1.14                             | (0.65-2.00)  |                                     |             | 21%              | 19%      |
|                                   | HLA-DRB1*03                     | 1.22                             | (0.74-2.01)  | 1.27                                | (0.74-2.19) | 25%              | 21%      |
|                                   | HLA-DRB1*04                     | 1.24                             | (0.79-1.94)  |                                     |             | 42%              | 37%      |
|                                   | HLA-DRB1*10                     | 1.74                             | (0.30-10.12) |                                     |             | 2%               | 2%       |
|                                   | HLA-DRB1*15                     | 1.02                             | (0.62-1.69)  | 1.08                                | (0.64-1.84) | 28%              | 27%      |
|                                   | HLA-DRB1*01/04/10               | 1.02                             | (0.66-1.57)  | 1.09                                | (0.68-1.76) | 54%              | 54%      |

<sup>1</sup> n=347 cases, n=2,074 controls.

<sup>2</sup> n=245 cases, n=1,442 controls.

<sup>3</sup> n=100 cases, n=608 controls.

<sup>4</sup> univariate conditional logistic regression; exposure and reference group were mutually exclusive and collectively exhaustive.

<sup>5</sup> multivariate conditional logistic regression; HLA-DRB1\*03, HLA-DRB1\*15 and HLA-DRB1\*01/04/10 were explanatory variables.

Abbreviations: HLA, human leukocyte antigen; pSS, primary Sjögren's syndrome; SSA, Ro/SSA autoantibodies; La/SSB autoantibodies; CI, confidence interval.

**Supplementary table 4.** SSA and SSB distribution in assessed HLA-DRB1 categories.

|                                       | <b>serological distribution</b>          |                                          |
|---------------------------------------|------------------------------------------|------------------------------------------|
|                                       | <b>SSA/SSB positive<br/>pSS patients</b> | <b>SSA/SSB negative<br/>pSS patients</b> |
| <b>HLA-DRB1*03 pSS patients</b>       | 87%                                      | 13%                                      |
| <b>HLA-DRB1*15 pSS patients</b>       | 80%                                      | 20%                                      |
| <b>HLA-DRB1*01/04/10 pSS patients</b> | 52%                                      | 47%                                      |

Abbreviations: SSA, Ro/SSA autoantibodies; SSB, La/SSB autoantibodies; HLA, human leukocyte antigen; pSS, primary Sjögren's syndrome.
